# Supplementary material for: Protective Effect of Resveratrol Improves Systemic Inflammation Responses in LPS-Injected Lambs
Source: Animals (Basel). 2019 Oct 28;9(11):872. doi: 10.3390/ani9110872 (PMC6912468; doi:10.3390/ani9110872)
Supplement: Supplementary file 1 [file animals-09-00872-s001.docx]

**Table S1** Effect of lipopolysaccharides (LPS) on Heart rate in lambs

| **Time (d)** | **LPS (μg/kg BW)** | | | | ***p*-Value** |
| --- | --- | --- | --- | --- | --- |
| **0** | **0.25** | **1.25** | **2.5** |
| 1 | 104 ± 5.72a | 118 ± 4.08ab | 125 ± 5.12ab | 131 ± 13.73b | ***p*** < 0.05 |
| 3 | 115 ± 4.37a | 120 ± 9.70ab | 137 ± 5.17b | 139 ± 3.17b | ***p*** < 0.05 |
| 5 | 117 ± 4.51a | 120 ± 6.34a | 125 ± 10.09ab | 143 ± 1.20b | ***p*** < 0.05 |
| 7 | 113 ± 6.35a | 134 ± 7.71ab | 133 ± 11.16ab | 144 ± 2.08b | ***p*** < 0.05 |
| 9 | 109 ± 5.01a | 125 ± 8.05ab | 131 ± 16.09ab | 141 ± 2.50b | ***p*** < 0.05 |

a,b Values within a row with different superscripts are different from each other (***p*** < 0.05).
